# Supplementary material
Source: publisher site journal article supplement (https://www.dovepress.com/get_supplementary_file.php?f=475714.docx)
Supplement: Supplementary file 1 [file get_supplementary_file.php]

**Supplementary Table 1** Details of Mendelian randomization study data

| Exposure or Outcome | GWAS-ID | N | SNPs | Network source | Population |
| --- | --- | --- | --- | --- | --- |
| MVPA | ebi-a-GCST006097 | 377,234 | 11,808,007 | Int J Obes (Lond). 2018:42:1161. | European |
| VPA | ebi-a-GCST006098 | 261,055 | 11,803,978 | Int J Obes (Lond). 2018:42:1161. | European |
| AA | ebi-a-GCST006099 | 91,084 | 11,796,201 | Int J Obes (Lond). 2018:42:1161. | European |
| SSOE | ebi-a-GCST006100 | 350,496 | 11,807,536 | Int J Obes (Lond). 2018:42:1161. | European |
| Frailty index | ebi-a-GCST90020053 | 175,226 | 7,589,717 | https://gwas.mrcieu.ac.uk | European |
| asthma | finn-b-J10_ASTHMA | 156,078 | 16,380,176 | https://gwas.mrcieu.ac.uk | European |
| COPD | finn-b-J10_COPD | 193,638 | 16,380,382 | https://gwas.mrcieu.ac.uk | European |

**Abbreviations:** MVPA, self-reported moderate to vigorous physical activity; VPA, self-reported vigorous physical activity; AA, accelerometer-assessed physical activity; SSOE, self-reported strenuous exercise or other exercise; SNPs, single-nucleotide polymorphisms; COPD, chronic obstructive pulmonary disease; N, Sample size of data sources.

**Supplementary Table 2 Details of IVs** (**A**) Selection of instrumental variables for MVPA; (**B**) Selection of instrumental variables for VPA; (**C**): Selection of instrumental variables for AA; (**D**): Selection of instrumental variables for SSOE; (**E**) Selection of instrumental variables for MVMR; (**F**): Selection of instrumental variables for SSOE in mediated Mendelian randomization; (**G**) Selection of instrumental variables for frailty index-asthma model in mediated Mendelian randomization; (**H**) Selection of instrumental variables for frailty index-COPD model in mediated Mendelian randomization.

**A**

| SNP | EA | OA | Beta | SE | Eaf | Pval | F |
| --- | --- | --- | --- | --- | --- | --- | --- |
| rs10145335 | A | G | 0.0141221 | 0.00254139 | 0.250611 | 2.70E-08 | 30.87848 |
| rs1043595 | A | G | -0.014411 | 0.00245416 | 0.282865 | 4.30E-09 | 34.48121 |
| rs1186721 | A | G | 0.01299 | 0.00237226 | 0.315844 | 4.40E-08 | 29.98429 |
| rs12912808 | T | C | -0.017546 | 0.00310889 | 0.148607 | 1.70E-08 | 31.85265 |
| rs1921981 | A | G | -0.013037 | 0.00237139 | 0.325647 | 3.80E-08 | 30.22382 |
| rs1972763 | T | C | -0.0128383 | 0.00232366 | 0.657628 | 3.30E-08 | 30.526 |
| rs1974771 | A | G | 0.0213389 | 0.00367836 | 0.099975 | 6.60E-09 | 33.65392 |
| rs2035562 | G | A | 0.0138763 | 0.00235606 | 0.672483 | 3.90E-09 | 34.68763 |
| rs2114286 | G | A | 0.0122453 | 0.00221725 | 0.534243 | 3.30E-08 | 30.50068 |
| rs2854277 | T | C | -0.0320288 | 0.00506676 | 0.082571 | 2.60E-10 | 39.95956 |
| rs2942127 | A | G | -0.016037 | 0.00290278 | 0.824644 | 3.30E-08 | 30.52235 |
| rs2988004 | G | T | 0.0131708 | 0.00223979 | 0.442245 | 4.10E-09 | 34.57878 |
| rs4886868 | G | T | 0.0124954 | 0.00226611 | 0.585862 | 3.50E-08 | 30.40453 |
| rs7326482 | T | G | 0.0129605 | 0.00229416 | 0.615163 | 1.60E-08 | 31.91509 |
| rs77742115 | C | T | 0.018348 | 0.00319777 | 0.138319 | 9.60E-09 | 32.92176 |
| rs7804463 | C | T | -0.0150095 | 0.00221333 | 0.470424 | 1.20E-11 | 45.98753 |
| rs877483 | C | T | -0.0122277 | 0.00222756 | 0.566815 | 4.00E-08 | 30.13219 |
| rs921915 | C | T | 0.0138882 | 0.00224013 | 0.587905 | 5.70E-10 | 38.43665 |

**B**

| SNP | EA | OA | Beta | SE | Eaf | Pval | F |
| --- | --- | --- | --- | --- | --- | --- | --- |
| rs13243553 | A | G | -0.00874851 | 0.00134959 | 0.392021 | 9.00E-11 | 42.02082 |
| rs2764261 | G | A | -0.00912633 | 0.00136054 | 0.625689 | 2.00E-11 | 44.99556 |
| rs328902 | T | C | 0.00878858 | 0.0014168 | 0.314508 | 5.50E-10 | 38.47869 |
| rs3781411 | T | C | -0.0125792 | 0.00199721 | 0.123618 | 3.00E-10 | 39.66967 |
| rs6667222 | C | A | -0.00873051 | 0.00151739 | 0.251857 | 8.70E-09 | 33.10433 |
| rs9276758 | A | G | -0.00803189 | 0.00141706 | 0.311693 | 1.40E-08 | 32.12618 |

**C**

| SNP | EA | OA | Beta | SE | Eaf | Pval | F |
| --- | --- | --- | --- | --- | --- | --- | --- |
| rs34517439 | A | C | -0.30792 | 0.0562443 | 0.120938 | 4.40E-08 | 29.9722098 |
| rs6775319 | T | A | -0.225081 | 0.040802 | 0.729248 | 3.50E-08 | 30.430898 |
| rs9293503 | C | T | -0.328953 | 0.0586852 | 0.111505 | 2.10E-08 | 31.4203143 |
| rs12522261 | A | G | -0.210522 | 0.0383038 | 0.343473 | 3.90E-08 | 30.2072543 |
| rs148193266 | C | A | 0.510362 | 0.0921544 | 0.042668 | 3.10E-08 | 30.670758 |
| rs56194509 | G | T | 0.303404 | 0.0439408 | 0.220486 | 5.00E-12 | 47.6767546 |

**D**

| SNP | EA | OA | Beta | SE | Eaf | Pval | F |
| --- | --- | --- | --- | --- | --- | --- | --- |
| rs111901094 | T | G | -0.0087724 | 0.00147943 | 0.182455 | 3.00E-09 | 35.15993 |
| rs1200154 | A | G | 0.00628507 | 0.00114355 | 0.592867 | 3.90E-08 | 30.20716 |
| rs1265178 | A | G | -0.00731312 | 0.00132256 | 0.237741 | 3.20E-08 | 30.57557 |
| rs159544 | G | A | 0.00697447 | 0.00115035 | 0.394795 | 1.30E-09 | 36.75889 |
| rs166840 | A | G | -0.00764832 | 0.00115131 | 0.411977 | 3.10E-11 | 44.13138 |
| rs288070 | A | G | 0.0105989 | 0.00188621 | 0.098249 | 1.90E-08 | 31.57487 |
| rs2994326 | C | T | 0.00796105 | 0.00145523 | 0.813408 | 4.50E-08 | 29.92798 |
| rs4411372 | C | T | 0.00702379 | 0.00125228 | 0.280227 | 2.00E-08 | 31.45865 |
| rs75930676 | C | T | 0.0157735 | 0.00262843 | 0.050872 | 2.00E-09 | 36.01333 |

**E**

| SNP | EA | OA |
| --- | --- | --- |
| rs10946808 | G | A |
| rs11012732 | G | A |
| rs111901094 | T | G |
| rs1200154 | A | G |
| rs12522261 | A | G |
| rs1265178 | A | G |
| rs148193266 | C | A |
| rs159544 | G | A |
| rs166840 | A | G |
| rs288070 | A | G |
| rs2994326 | C | T |
| rs34517439 | A | C |
| rs4411372 | C | T |
| rs4865667 | T | C |
| rs56194509 | G | T |
| rs59499656 | T | A |
| rs62253088 | C | T |
| rs6775319 | T | A |
| rs75930676 | C | T |
| rs896302 | T | C |
| rs9293503 | C | T |

**F**

| SNP | EA | OA | Beta | SE | Eaf | Pval | F |
| --- | --- | --- | --- | --- | --- | --- | --- |
| rs10946808 | G | A | 0.00770783 | 0.00126135 | 0.272926 | 9.90E-10 | 37.34161 |
| rs111901094 | T | G | -0.0087724 | 0.00147943 | 0.182455 | 3.00E-09 | 35.15993 |
| rs1265178 | A | G | -0.00731312 | 0.00132256 | 0.237741 | 3.20E-08 | 30.57557 |
| rs159544 | G | A | 0.00697447 | 0.00115035 | 0.394795 | 1.30E-09 | 36.75889 |
| rs166840 | A | G | -0.00764832 | 0.00115131 | 0.411977 | 3.10E-11 | 44.13138 |
| rs288070 | A | G | 0.0105989 | 0.00188621 | 0.098249 | 1.90E-08 | 31.57487 |
| rs2994326 | C | T | 0.00796105 | 0.00145523 | 0.813408 | 4.50E-08 | 29.92798 |
| rs4411372 | C | T | 0.00702379 | 0.00125228 | 0.280227 | 2.00E-08 | 31.45865 |
| rs4865667 | T | C | -0.00661328 | 0.00115524 | 0.387473 | 1.00E-08 | 32.77098 |
| rs62253088 | C | T | -0.010885 | 0.00119786 | 0.673024 | 1.00E-19 | 82.57427 |
| rs75930676 | C | T | 0.0157735 | 0.00262843 | 0.050872 | 2.00E-09 | 36.01333 |
| rs896302 | T | C | -0.00701349 | 0.00124452 | 0.713208 | 1.70E-08 | 31.75884 |

**G**

| SNP | EA | OA | Beta | SE | Eaf | Pval | F |
| --- | --- | --- | --- | --- | --- | --- | --- |
| rs1363103 | C | T | -0.0191 | 0.0034 | 0.3800 | 2.23E-08 | 31.55796 |
| rs17612102 | C | T | 0.0187 | 0.0034 | 0.5933 | 2.85E-08 | 30.25000 |
| rs2396766 | A | G | 0.0201 | 0.0033 | 0.4725 | 1.22E-09 | 37.09917 |
| rs4146140 | T | C | -0.0198 | 0.0034 | 0.3811 | 6.83E-09 | 33.91349 |
| rs4952693 | T | C | -0.0194 | 0.0034 | 0.3734 | 1.47E-08 | 32.55709 |
| rs56299474 | A | C | 0.0241 | 0.0044 | 0.1733 | 3.94E-08 | 30.00052 |
| rs583514 | C | T | 0.0199 | 0.0033 | 0.5111 | 1.65E-09 | 36.36455 |
| rs8089807 | T | C | -0.0248 | 0.0043 | 0.1866 | 6.50E-09 | 33.26339 |
| rs82334 | C | A | -0.0223 | 0.0035 | 0.3177 | 3.13E-10 | 40.59510 |

**H**

| SNP | EA | OA | Beta | SE | Eaf | Pval | F |
| --- | --- | --- | --- | --- | --- | --- | --- |
| rs1363103 | C | T | -0.0191 | 0.0034 | 0.3800 | 2.23E-08 | 31.55796 |
| rs17612102 | C | T | 0.0187 | 0.0034 | 0.5933 | 2.85E-08 | 30.25000 |
| rs2396766 | A | G | 0.0201 | 0.0033 | 0.4725 | 1.22E-09 | 37.09917 |
| rs3959554 | G | A | 0.0189 | 0.0034 | 0.4177 | 1.74E-08 | 30.90052 |
| rs4146140 | T | C | -0.0198 | 0.0034 | 0.3811 | 6.83E-09 | 33.91349 |
| rs4952693 | T | C | -0.0194 | 0.0034 | 0.3734 | 1.47E-08 | 32.55709 |
| rs56299474 | A | C | 0.0241 | 0.0044 | 0.1733 | 3.94E-08 | 30.00052 |
| rs583514 | C | T | 0.0199 | 0.0033 | 0.5111 | 1.65E-09 | 36.36455 |
| rs8089807 | T | C | -0.0248 | 0.0043 | 0.1866 | 6.50E-09 | 33.26339 |
| rs82334 | C | A | -0.0223 | 0.0035 | 0.3177 | 3.13E-10 | 40.59510 |

**Abbreviations:** MVPA, self-reported moderate to vigorous physical activity; VPA, self-reported vigorous physical activity; AA, accelerometer-assessed physical activity; SSOE, self-reported strenuous exercise or other exercise; SNPs, single-nucleotide polymorphisms; COPD, chronic obstructive pulmonary disease; EA, effect-allele; OA, other-allele.

**Supplementary Table 3** Results of sensitivity analyses of physical activity and asthma and COPD

| Physical activity | Outcome | Cochran’s Q test | | MR-Egger intercept test | | MR-PRESSO |
| --- | --- | --- | --- | --- | --- | --- |
| *P* (IVW) | *P* (MR-Egger) | Intercept | *P* | *P* |
| MVPA | asthma | 0.334 | 0.314 | 0.012 | 0.432 | 0.347 |
| VPA | asthma | 0.048 | 0.031 | -0.028 | 0.672 | 0.071 |
| AA  SSOE | asthma  asthma | 0.768  0.307 | 0.637  0.223 | 0.003  -0.0001 | 0.912  0.996 | 0.799  0.355 |
| MVPA | COPD | 0.019 | 0.086 | 0.054 | 0.048 | 0.018 |
| VPA | COPD | 0.451 | 0.779 | 0.103 | 0.161 | 0.436 |
| AA  SSOE | COPD  COPD | 0.085  0.575 | 0.059  0.467 | -0.023  0.003 | 0.686  0.930 | 0.108  0.606 |

**Abbreviations:** MVPA, self-reported moderate to vigorous physical activity; VPA, self-reported vigorous physical activity; AA, accelerometer-assessed physical activity; SSOE, self-reported strenuous exercise or other exercise; COPD, chronic obstructive pulmonary disease; IVW, Inverse Variance-Weighted.

**Supplementary Table 4** Sensitivity analysis results for MVMR

| Physical activity | Outcome | *P* (Heterogeneity test statistic) | *P* (intercept test) |
| --- | --- | --- | --- |
| AA | asthma | 0.053 | 0.119 |
| SSOE | asthma | 0.053 | 0.119 |
| AA | COPD | 0.210 | 0.166 |
| SSOE | COPD | 0.210 | 0.166 |

**Abbreviations:** AA, accelerometer-assessed physical activity; SSOE, self-reported strenuous exercise or other exercise; COPD, chronic obstructive pulmonary disease; MVMR, Multivariate Mendelian randomization

**Supplementary Table 5** Sensitivity analysis results from mediated Mendelian randomization analysis

| Exposure | Outcome | Cochran’s Q test | | MR-Egger intercept test | | MR-PRESSO |
| --- | --- | --- | --- | --- | --- | --- |
| *P* (IVW) | *P* (MR-Egger) | Intercept | *P* | *P* |
| SSOE | Frailty index | 0.775 | 0.701 | -0.001 | 0.864 | 0.782 |
| Frailty index | asthma | 0.177 | 0.148 | -0.038 | 0.530 | 0.207 |
| Frailty index | COPD | 0.901 | 0.880 | -0.046 | 0.534 | 0.912 |

**Abbreviations:** SSOE, self-reported strenuous exercise or other exercise; COPD, chronic obstructive pulmonary disease.


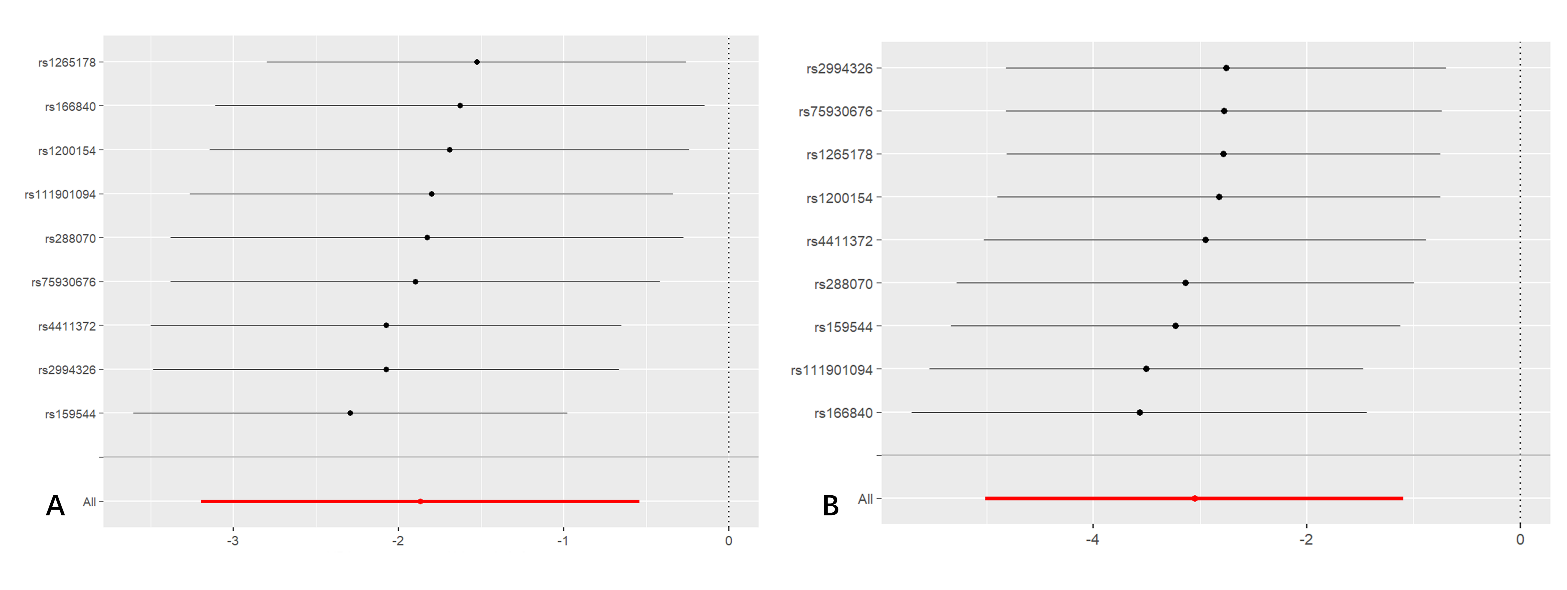
**Supplementary Figures 1 (A)**:Result of the leave-one-out analysis of the SSOE-asthma model;(**B)**:Result of the leave-one-out analysis of the SSOE-COPD model;**SSOE**:self-reported strenuous exercise or other exercise;**COPD**:Chronic obstructive pulmonary disease


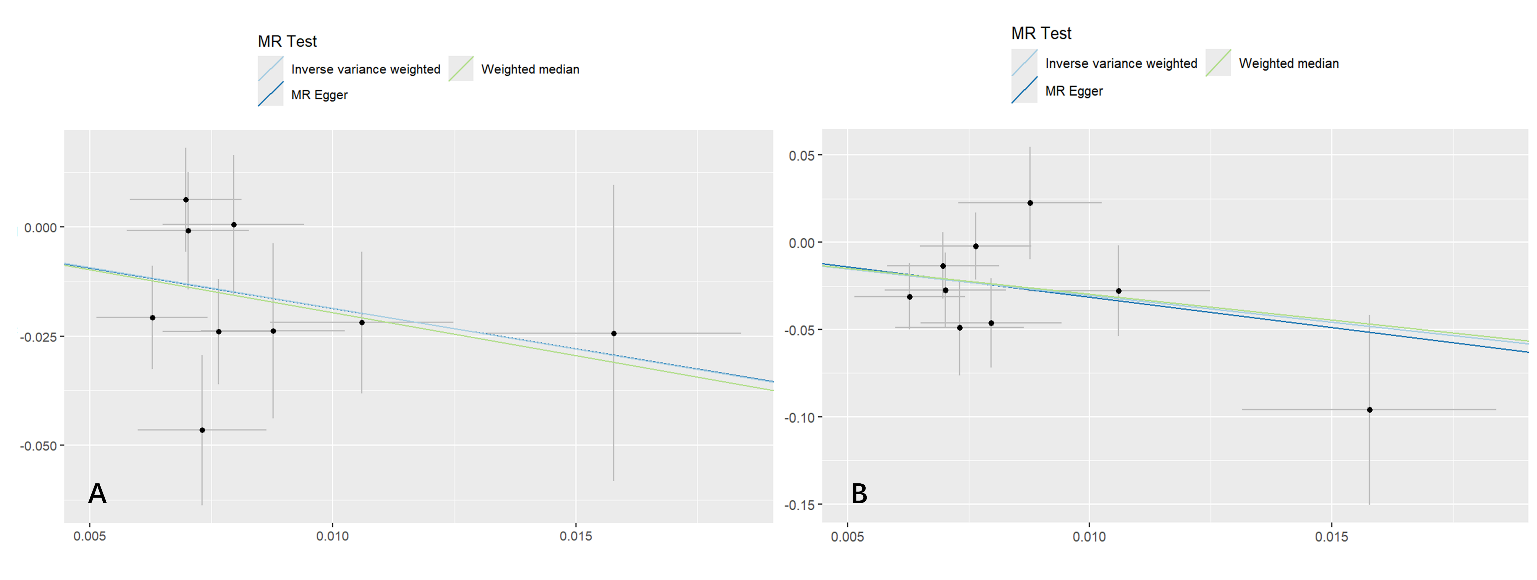


**Supplementary Figures 2 (A)**:Scatterplot results for SSOE-asthma model;(**B)**:Scatterplot results for SSOE-COPD model;**SSOE**:self-reported strenuous exercise or other exercise;**COPD**:Chronic obstructive pulmonary disease

**
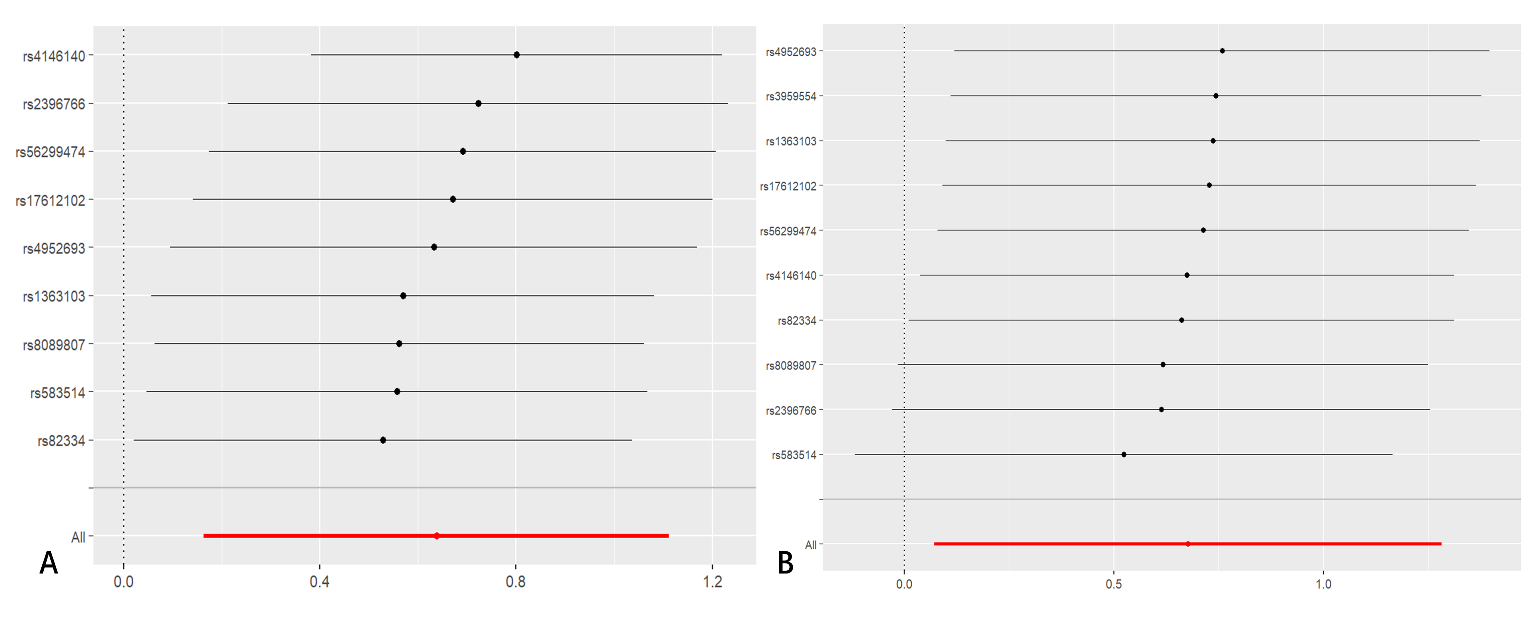
**

**Supplementary Figures 3 (A)**: Result of the leave-one-out analysis of the frailty-asthma model;(**B)**:Result of the leave-one-out analysis of the frailty-COPD model; **COPD**:Chronic obstructive pulmonary disease


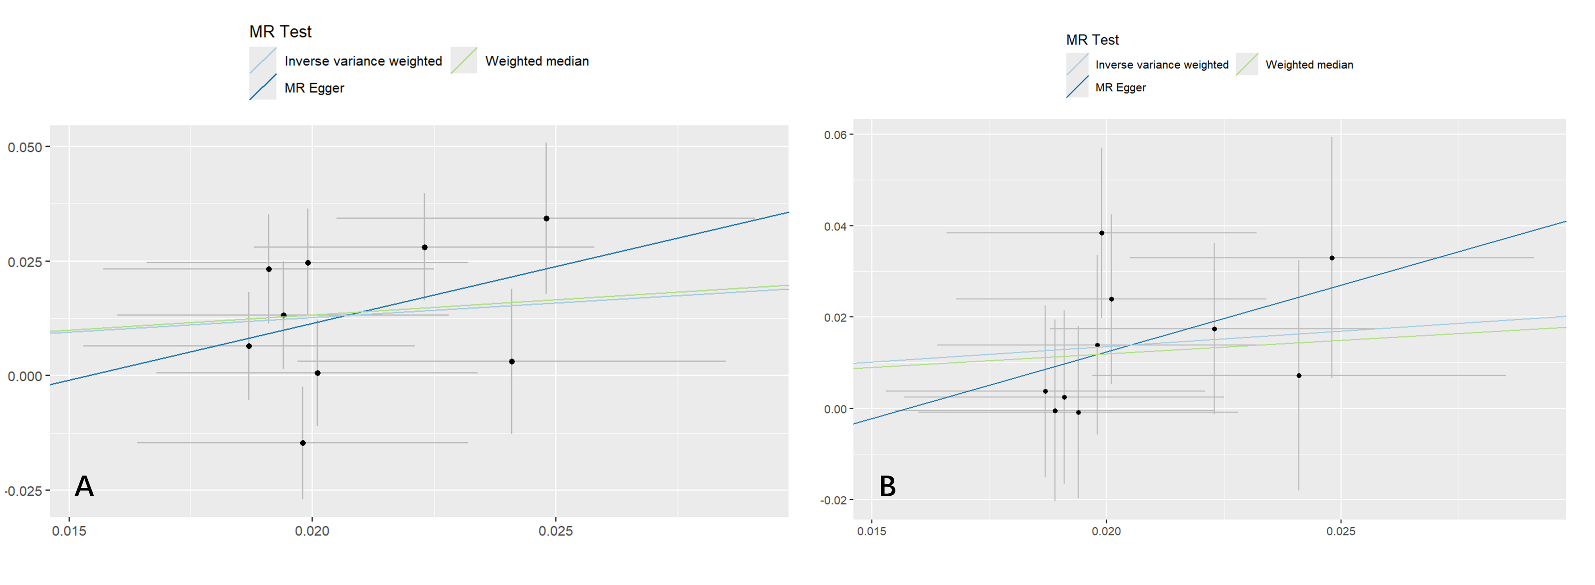


**Supplementary Figures 4 (A)**:Scatterplot results for frailty-asthma model;(**B)**:Scatterplot results for frailty-COPD model; **COPD**:Chronic obstructive pulmonary disease
